# Supplementary material for: Study protocol: a pragmatic trial reviewing the effectiveness of the TransitionMate mobile application in supporting self-management and transition to adult healthcare services for young people with chronic illnesses
Source: BMC Health Serv Res. 2022 Nov 29;22:1443. doi: 10.1186/s12913-022-08536-8 (PMC9706969; doi:10.1186/s12913-022-08536-8)

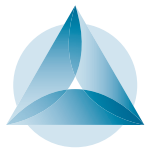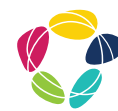

# TRANSITION READINESS CHECKLIST

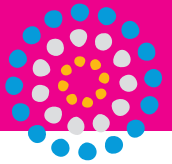

Use this checklist to identify the skills you already have, and the areas where you may need to increase your knowledge to help you prepare for transition.

|                       |                     |                  |      |      |
|-----------------------|---------------------|------------------|------|------|
| Date:                 | MRN:                | Name:            | Sex: | DOB: |
|                       |                     |                  |      |      |
| Home Phone:           | Mobile:             | Email:           |      |      |
|                       |                     |                  |      |      |
| Interpreter required: | Preferred language: | Mailing address: |      |      |
|                       |                     |                  |      |      |

1. I know the names of my medications and what they are for.
2. I have allergies and I know how to manage them.
3. I can confidently name and explain my medical condition and treatment plan.
4. I am responsible for remembering and administering my medications.
5. I am aware of any side effects of the medications I take.
6. I am responsible for getting my prescriptions.
7. I know the equipment I need for treatment and what it is used for.
8. I am familiar with the tests that I have regularly and why I need to have them.
9. I can make or reschedule my own appointments.
10. I know who I can direct health questions to and I feel comfortable asking.
11. I can attend appointments without my parent/guardian present.
12. I have a GP and feel comfortable with.

| I'm on top of this | I need to work on this | I have no idea | N/A |
|--------------------|------------------------|----------------|-----|
|                    |                        |                |     |
|                    |                        |                |     |
|                    |                        |                |     |
|                    |                        |                |     |
|                    |                        |                |     |
|                    |                        |                |     |
|                    |                        |                |     |
|                    |                        |                |     |
|                    |                        |                |     |
|                    |                        |                |     |
|                    |                        |                |     |
|                    |                        |                |     |
|                    |                        |                |     |
|                    |                        |                |     |

**TICK THE  
BOXES**

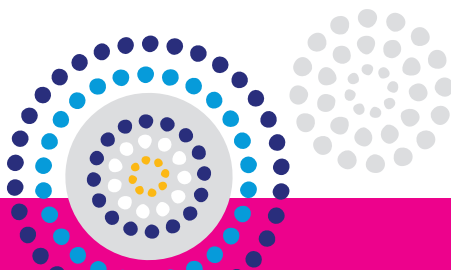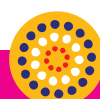

## TRANSITION READINESS CHECKLIST cont.

|                                                                                                    | I'm on top of this | I need to work on this | I have no idea | N/A |
|----------------------------------------------------------------------------------------------------|--------------------|------------------------|----------------|-----|
| 13. I know what to do when I become unwell.                                                        |                    |                        |                |     |
| 14. I know who to contact if I need help.                                                          |                    |                        |                |     |
| 15. I know where/how to get information about peer support programs.                               |                    |                        |                |     |
| 16. I know about resources that offer support for young people like me.                            |                    |                        |                |     |
| 17. I understand my rights to privacy and my role in decision making.                              |                    |                        |                |     |
| 18. I know where to get information about sexual health, drugs, alcohol and stress.                |                    |                        |                |     |
| 19. I understand what transition means.                                                            |                    |                        |                |     |
| 20. I have been given information about the adult service and I feel comfortable about the choice. |                    |                        |                |     |
| 21. I am actively involved in my transition.                                                       |                    |                        |                |     |
| 22. I have my own Medicare card.                                                                   |                    |                        |                |     |
| 23. I have my own Health care card.                                                                |                    |                        |                |     |
| 24. I know my private health insurance details.                                                    |                    |                        |                |     |
| 25. I know the names and contact information of the people I'm seeing in the adult service.        |                    |                        |                |     |
| 26. I have visited the adult service I am transitioning to.                                        |                    |                        |                |     |
| 27. I have attended my first appointment for my new health service.                                |                    |                        |                |     |

### Comments:

---



---



---

**TICK THE  
BOXES**

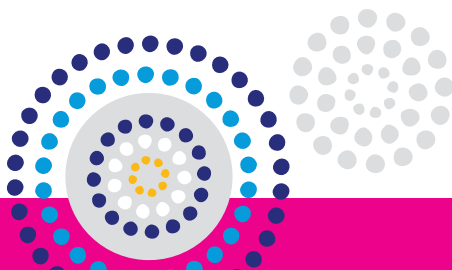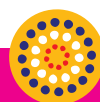

Supplement: Supplementary file 2 — Additional file 2. Transition_Readiness_Checklist [file 12913_2022_8536_MOESM2_ESM.pdf]
